# Supplementary material for: Current trends of clinical trials involving CRISPR/Cas systems
Source: Front Med (Lausanne). 2023 Nov 10;10:1292452. doi: 10.3389/fmed.2023.1292452 (PMC10666174; doi:10.3389/fmed.2023.1292452)
Supplement: Supplementary file 1 [file Table_1.XLSX]

## Sheet: SearchResults
Number	Categories	NCT Number	Title	Status	Publication	Condition or disease	Intervention/treatment	Phase	Study Type	Locations	URL
1	Cancer	NCT03057912	A Safety and Efficacy Study of TALEN and CRISPR/Cas9 in the Treatment of HPV-related Cervical Intraepithelial NeoplasiaⅠ?	Unknown status	No Results Available	Human Papillomavirus-Related Malignant Neoplasm	Biological: TALEN|Biological: CRISPR/Cas9	Phase 1	Interventional	The First Affiliated Hospital of Sun Yat-sen University, Guangzhou, Guangdong, China	https://ClinicalTrials.gov/show/NCT03057912
2		NCT04426669	A Study of Metastatic Gastrointestinal Cancers Treated With Tumor Infiltrating Lymphocytes in Which the Gene Encoding the Intracellular Immune Checkpoint CISH Is Inhibited Using CRISPR Genetic Engineering	Recruiting	No Results Available	Gastrointestinal Epithelial Cancer|Gastrointestinal Neoplasms|Cancer of Gastrointestinal Tract|Cancer, Gastrointestinal|Gastrointestinal Cancer|Colo-rectal Cancer|Pancreatic Cancer|Gall Bladder Cancer|Colon Cancer|Esophageal Cancer|Stomach Cancer	Drug: Cyclophosphamide|Drug: Fludarabine|Biological: Tumor-Infiltrating Lymphocytes (TIL)|Drug: Aldesleukin	Phase 1|Phase 2	Interventional	Masonic Cancer Center, University of Minnesota, Minneapolis, Minnesota, United States	https://ClinicalTrials.gov/show/NCT04426669
3		NCT03545815	Study of CRISPR-Cas9 Mediated PD-1 and TCR Gene-knocked Out Mesothelin-directed CAR-T Cells in Patients With Mesothelin Positive Multiple Solid Tumors.	Unknown status	Wang Z, Li N, Feng K, Chen M, Zhang Y, Liu Y, Yang Q, Nie J, Tang N, Zhang X, Cheng C, Shen L, He J, Ye X, Cao W, Wang H, Han W. Phase I study of CAR-T cells with PD-1 and TCR disruption in mesothelin-positive solid tumors. Cell Mol Immunol. 2021 Sep;18(9):2188-2198. doi: 10.1038/s41423-021-00749-x. Epub 2021 Aug 11. PMID: 34381179; PMCID: PMC8429583.	Solid Tumor, Adult	Biological: anti-mesothelin CAR-T cells	Phase 1	Interventional	Biotherapeutic Department and Hematology Department of Chinese PLA General Hospital, Beijing, China	https://ClinicalTrials.gov/show/NCT03545815
4		NCT04244656	A Safety and Efficacy Study Evaluating CTX120 in Subjects With Relapsed or Refractory Multiple Myeloma	Active, not recruiting	Bruno B, Wäsch R, Engelhardt M, Gay F, Giaccone L, D'Agostino M, Rodríguez-Lobato LG, Danhof S, Gagelmann N, Kröger N, Popat R, Van de Donk NWCJ, Terpos E, Dimopoulos MA, Sonneveld P, Einsele H, Boccadoro M. European Myeloma Network perspective on CAR T-Cell therapies for multiple myeloma. Haematologica. 2021 Aug 1;106(8):2054-2065. doi: 10.3324/haematol.2020.276402. PMID: 33792221; PMCID: PMC832…	Multiple Myeloma	Biological: CTX120	Phase 1	Interventional	University of Chicago, Chicago, Illinois, United States|Oregon Health and Science University, Portland, Oregon, United States|University of Pennsylvania, Philadelphia, Pennsylvania, United States|Sarah Cannon Research Institute, Nashville, Tennessee, United States|(and 6 more…)	https://ClinicalTrials.gov/show/NCT04244656
5		NCT04438083	A Safety and Efficacy Study Evaluating CTX130 in Subjects With Relapsed or Refractory Renal Cell Carcinoma (COBALT-RCC)	Active, not recruiting	No Results Available	Renal Cell Carcinoma	Biological: CTX130	Phase 1	Interventional	Research Site 2, Duarte, California, United States|Research Site 5, Hartford, Connecticut, United States|Research Site 4, Houston, Texas, United States|Research Site 3, Salt Lake City, Utah, United States|Research Site 1, Melbourne, Victoria, Australia|Research Site 6, Toronto, Ontario, Canada|Research Site 7, Amsterdam, North Holland, Netherlands	https://ClinicalTrials.gov/show/NCT04438083
6		NCT04637763	CRISPR-Edited Allogeneic Anti-CD19 CAR-T Cell Therapy for Relapsed/Refractory B Cell Non-Hodgkin Lymphoma	Recruiting	No Results Available	Lymphoma, Non-Hodgkin|Relapsed Non Hodgkin Lymphoma|Refractory B-Cell Non-Hodgkin Lymphoma|Non Hodgkin Lymphoma|Lymphoma|B Cell Lymphoma|B Cell Non-Hodgkin's Lymphoma	Genetic: CB-010|Drug: Cyclophosphamide|Drug: Fludarabine	Phase 1	Interventional	HonorHealth, Scottsdale, Arizona, United States|University of California San Diego Moores Cancer Center, La Jolla, California, United States|Chao Family Comprehensive Cancer Center/University of California Irvine, Orange, California, United States|Holden Comprehensive Cancer Center at the University of Iowa, Iowa City, Iowa, United States|Atlantic Health System, Morristown, New Jersey, United Sta…	https://ClinicalTrials.gov/show/NCT04637763
7		NCT04037566	CRISPR (HPK1) Edited CD19-specific CAR-T Cells (XYF19 CAR-T Cells) for CD19+ Leukemia or Lymphoma.	Recruiting	No Results Available	Leukemia Lymphocytic Acute (ALL) in Relapse|Leukemia Lymphocytic Acute (All) Refractory|Lymphoma, B-Cell|CD19 Positive	Genetic: XYF19 CAR-T cell|Drug: Cyclophosphamide|Drug: Fludarabine	Phase 1	Interventional	Xijing Hospital, Xi'an, Shannxi, China	https://ClinicalTrials.gov/show/NCT04037566
8		NCT05643742	A Safety and Efficacy Study Evaluating CTX112 in Subjects With Relapsed or Refractory B-Cell Malignancies	Recruiting	No Results Available	B-cell Lymphoma|Non-Hodgkin Lymphoma|B-cell Malignancy|Chronic Lymphocytic Leukemia (CLL)/Small Lymphocytic Lymphoma (SLL)|Follicular Lymphoma|Mantle Cell Lymphoma|Marginal Zone Lymphoma|Large B-cell Lymphoma	Biological: CTX112	Phase 1|Phase 2	Interventional	Research Site, Saint Louis, Missouri, United States|Research Site, San Antonio, Texas, United States	https://ClinicalTrials.gov/show/NCT05643742
9		NCT04502446	A Safety and Efficacy Study Evaluating CTX130 in Subjects With Relapsed or Refractory T or B Cell Malignancies (COBALT-LYM)	Recruiting	Iyer SP, Sica RA, Ho PJ, et al. The COBALT-LYM study of CTX130: a phase 1 dose escalation study of CD70-targeted allogeneic CRISPR-Cas9–engineered CAR T cells in patients with relapsed/refractory (r/r) T-cell malignancies. Presented at: 2022 Hybrid Congress of the European Hematology Association (EHA). June 9-12, 2022; Vienna, Austria. Abstract #S262	T Cell Lymphoma	Biological: CTX130	Phase 1	Interventional	Research Site 2, Duarte, California, United States|Research Site 5, Stanford, California, United States|Research Site 10, New Haven, Connecticut, United States|Research Site 4, Miami, Florida, United States|Research Site 8, Bronx, New York, United States|Research Site 9, New York, New York, United States|Research Site 1, Houston, Texas, United States|Research Site 6, Salt Lake City, Utah, United …	https://ClinicalTrials.gov/show/NCT04502446
10		NCT04035434	A Safety and Efficacy Study Evaluating CTX110 in Subjects With Relapsed or Refractory B-Cell Malignancies (CARBON)	Recruiting	No Results Available	B-cell Malignancy|Non-Hodgkin Lymphoma|B-cell Lymphoma|Adult B Cell ALL	Biological: CTX110	Phase 1	Interventional	Cedars Sinai, Los Angeles, California, United States|UCSF Medical Center, San Francisco, California, United States|Mayo Clinic, Jacksonville, Florida, United States|Emory University Winship Cancer Institute, Atlanta, Georgia, United States|University of Chicago, Chicago, Illinois, United States|University of Kansas, Westwood, Kansas, United States|Markey Cancer Center, University of Kentucky, Lex…	https://ClinicalTrials.gov/show/NCT04035434
11		NCT05566223	CISH Inactivated TILs in the Treatment of NSCLC	Not yet recruiting	No Results Available	Carcinoma, Non-Small-Cell Lung|Metastatic Non Small Cell Lung Cancer|Stage IV Non-small Cell Lung Cancer|Squamous Cell Lung Cancer|Adenocarcinoma of Lung|Large Cell Lung Cancer	Drug: Fludarabine|Drug: Cyclophosphamide|Biological: CISH Inactivated TIL|Drug: Aldesleukin|Drug: Pembrolizumab	Phase 1|Phase 2	Interventional	City of Hope Comprehensive Cancer Center, Duarte, California, United States|Masonic Cancer Center, University of Minnesota, Minneapolis, Minnesota, United States	https://ClinicalTrials.gov/show/NCT05566223
12		NCT03747965	Study of PD-1 Gene-knocked Out Mesothelin-directed CAR-T Cells With the Conditioning of PC in Mesothelin Positive Multiple Solid Tumors	Unknown status	No Results Available	Solid Tumor, Adult	Biological: Mesothelin-directed CAR-T cells	Phase 1	Interventional	Chinese PLA General Hospital, Beijing, Beijing, China	https://ClinicalTrials.gov/show/NCT03747965
13		NCT04557436	TT52CAR19 Therapy for B-cell Acute Lymphoblastic Leukaemia (B-ALL)	Active, not recruiting	Ottaviano G, Georgiadis C, Gkazi SA, Syed F, Zhan H, Etuk A, Preece R, Chu J, Kubat A, Adams S, Veys P, Vora A, Rao K, Qasim W; TT52 CRISPR-CAR group. Phase 1 clinical trial of CRISPR-engineered CAR19 universal T cells for treatment of children with refractory B cell leukemia. Sci Transl Med. 2022 Oct 26;14(668):eabq3010. doi: 10.1126/scitranslmed.abq3010. Epub 2022 Oct 26. PMID: 36288281.	B Acute Lymphoblastic Leukemia	Drug: PBLTT52CAR19	Phase 1	Interventional	Great Ormond Street Hospital, London, United Kingdom	https://ClinicalTrials.gov/show/NCT04557436
14		NCT03166878	A Study Evaluating UCART019 in Patients With Relapsed or Refractory CD19+ Leukemia and Lymphoma	Unknown status	No Results Available	B Cell Leukemia|B Cell Lymphoma	Biological: UCART019	Phase 1|Phase 2	Interventional	Biotherapeutic Department and Hematology Department of Chinese PLA General Hospital, Beijing, Beijing, China	https://ClinicalTrials.gov/show/NCT03166878
15		NCT03398967	A Feasibility and Safety Study of Universal Dual Specificity CD19 and CD20 or CD22 CAR-T Cell Immunotherapy for Relapsed or Refractory Leukemia and Lymphoma	Unknown status	No Results Available	B Cell Leukemia|B Cell Lymphoma	Biological: Universal Dual Specificity CD19 and CD20 or CD22 CAR-T Cells	Phase 1|Phase 2	Interventional	Biotherapeutic Department and Hematology Department of Chinese PLA General Hospital, Beijing, Beijing, China	https://ClinicalTrials.gov/show/NCT03398967
16		NCT03081715	PD-1 Knockout Engineered T Cells for Advanced Esophageal Cancer	Completed	No Results Available	Esophageal Cancer	Other: PD-1 Knockout T Cells	N/A	Interventional	Hangzhou Cancer Hospital, Hangzhou, Zhejiang, China	https://ClinicalTrials.gov/show/NCT03081715
17		NCT05662904	Genetic Ablation of CD33 in HSC to Broaden the Therapeutic Index of CD33-directed Immunotherapy in Patients With AML	Not yet recruiting	No Results Available	Relapsed/Refractory Acute Myeloid Leukemia (AML)	Biological: Donor-derived CD34+ HSC with CRISPR/Cas9-mediated CD33 deletion|Drug: Gemtuzumab Ozogamicin	Phase 1	Interventional	University Hospital Dresden, Department of Medicine I, Dresden, Germany|University Hospital Heidelberg, Internal Medicine V, Heidelberg, Germany	https://ClinicalTrials.gov/show/NCT05662904
18		NCT02793856	PD-1 Knockout Engineered T Cells for Metastatic Non-small Cell Lung Cancer	Completed	Lu Y, Xue J, Deng T et al. Safety and feasibility of CRISPR-edited T cells in patients with refractory non-small-cell lung cancer. Nat Med. 2020 May;26(5):732-740. doi: 10.1038/s41591-020-0840-5. Epub 2020 Apr 27. Erratum in: Nat Med. 2020 Jul;26(7):1149. PMID: 32341578.	Metastatic Non-small Cell Lung Cancer	Drug: Cyclophosphamide|Other: PD-1 Knockout T Cells	Phase 1	Interventional	West China Hospital, Sichuan University, Chengdu, Sichuan, China	https://ClinicalTrials.gov/show/NCT02793856
19		NCT04417764	TACE Combined With PD-1 Knockout Engineered T Cell in Advanced Hepatocellular Carcinoma.	Recruiting	No Results Available	Advanced Hepatocellular Carcinoma	Procedure: Transcatheter arterial chemoembolization|Biological: PD-1 knockout engineered T cells	Phase 1	Interventional	The 3rd Xiangya Hospital of Central South University, Changsha, Hunan, China	https://ClinicalTrials.gov/show/NCT04417764
20		NCT05631912	TRAC Locus-inserted CD19-targeting STAR-T Cell Therapy in r/r B-NHL	Recruiting	No Results Available	Non-hodgkin Lymphoma,B Cell	Biological: Autologous CD19-STAR-T cell|Drug: Fludarabine|Drug: Cyclophosphamide	Phase 1|Phase 2	Interventional	Biotherapeutic Department, Chinese PLA General Hospital, Beijing, Beijing, China|School of medicine, Tsinghua University & Changping Laboratory, Beijing, Beijing, China	https://ClinicalTrials.gov/show/NCT05631912
21		NCT04976218	TGFβR-KO CAR-EGFR T Cells in Previously Treated Advanced EGFR-positive Solid Tumors	Recruiting	No Results Available	Solid Tumor, Adult|EGFR Overexpression	Biological: TGFβR-KO CAR-EGFR T Cells	Phase 1	Interventional	Chinese PLA General Hospital, Beijing, Beijing, China	https://ClinicalTrials.gov/show/NCT04976218
22		NCT04767308	Safety and Efficacy of CT125A Cells for Treatment of Relapsed/Refractory CD5+ Hematopoietic Malignancies	Not yet recruiting	Dai Z, Mu W, Zhao Y, Jia X, Liu J, Wei Q, Tan T, Zhou J. The rational development of CD5-targeting biepitopic CARs with fully human heavy-chain-only antigen recognition domains. Mol Ther. 2021 Sep 1;29(9):2707-2722. doi: 10.1016/j.ymthe.2021.07.001. Epub 2021 Jul 16. PMID: 34274536; PMCID: PMC8417515.	CD5+ Relapsed/Refractory Hematopoietic Malignancies|Chronic Lymphocytic Leukemia (CLL)|Mantle Cell Lymphoma (MCL)|Diffuse Large B-cell Lymphoma (DLBCL)|Follicular Lymphoma (FL)|Peripheral T-cell Lymphomas (PTCL)	Biological: CT125A cells|Drug: Cyclophosphamide, fludarabine	Early Phase 1	Interventional	No location data	https://ClinicalTrials.gov/show/NCT04767308
23		NCT05397184	Study of Base Edited CAR7 T Cells to Treat T Cell Malignancies (TvT CAR7)	Recruiting	Robert Chiesa, Christos Georgiadis, Giorgio Ottaviano, Farhatullah Syed, Toni Braybrook, Annie Etuk, Hong Zhan, Soragia Athina Gkazi, Roland Preece, Stuart Adams, Rebecca Thomas, Arnold Awuah, Kimberly Gilmour, Lana Mhaldien, Jan Chu, Danielle Pinner, Agnieszka Kubat, Paul Veys, Kanchan Rao, Giovanna Lucchini, David O'Connor, Ajay Vora, Waseem Qasim; Tvt CAR7: Phase 1 Clinical Trial of Base-Edite…	Relapsed/Refractory T-cell Acute Lymphoid Leukaemia	Biological: Cryopreserved BE CAR7 T cells (BE752TBCCLCAR7PBL)	Phase 1	Interventional	Ilyas Ali, London, United Kingdom	https://ClinicalTrials.gov/show/NCT05397184
24		NCT05309733	A Long-term Follow-up Study of Patients Who Received VOR33	Recruiting	No Results Available	Leukemia, Myeloid, Acute	Genetic: VOR33	N/A	Observational	University of California San Diego Moores Cancer Center, La Jolla, California, United States|Miami Cancer Institute, Miami, Florida, United States|Washington University School of Medicine Siteman Cancer Center, Saint Louis, Missouri, United States|John Theurer Cancer Center at Hackensack University Medical Center, Hackensack, New Jersey, United States|Memorial Sloan Kettering Cancer Center, New Y…	https://ClinicalTrials.gov/show/NCT05309733
25		NCT05447169	Epstein-Barr Virus Antibody and Epstein-Barr Virus DNA for Nasopharyngeal Carcinoma Screening	Recruiting	No Results Available	Nasopharyngeal Carcinoma	Diagnostic Test: EBV antibodies test|Diagnostic Test: EBV DNA test	N/A	Observational	Department of Nasopharyngeal Carcinoma, Sun Yat-sen University Cancer Center, Guangzhou, Guangdong, China	https://ClinicalTrials.gov/show/NCT05447169
26		NCT03044743	PD-1 Knockout EBV-CTLs for Advanced Stage Epstein-Barr Virus (EBV) Associated Malignancies	Unknown status	No Results Available	Stage IV Gastric Carcinoma|Stage IV Nasopharyngeal Carcinoma|T-Cell Lymphoma Stage IV|Stage IV Adult Hodgkin Lymphoma|Stage IV Diffuse Large B-Cell Lymphoma	Drug: Fludarabine|Drug: Cyclophosphamide|Drug: Interleukin-2	Phase 1|Phase 2	Interventional	The Comprehensive Cancer Center of Nanjing Drum Tower Hospital, Nanjing, Jiangsu, China|The Comprehensive Cancer Center of Nanjing Drum Tower Hospital, Nanjing, Jiangsu, China	https://ClinicalTrials.gov/show/NCT03044743
27		NCT05812326	PD-1 Knockout Anti-MUC1 CAR-T Cells in the Treatment of Advanced Breast Cancer	Completed	No Results Available	Advanced Breast Cancer|Breast Neoplasm Malignant Female	Drug: AJMUC1- PD-1 gene knockout anti-MUC1 CAR-T cells	Phase 1|Phase 2	Interventional	Sun Yat-sen Memorial Hospital of Sun Yat-sen University Guangzhou, Guangdong, China	https://clinicaltrials.gov/show/NCT05812326
28		NCT05795595	A Safety and Efficacy Study Evaluating CTX131 in Adult Subjects With Relapsed or Refractory Solid Tumors	Recruiting	No Results Available	Clear Cell Renal Cell Carcinoma|Cervical Carcinoma|Esophageal Carcinoma|Pancreatic Adenocarcinoma|Malignant Pleural Mesothelioma	Biological: CTX131	Phase 1|Phase 2	Interventional	Research Site 1 Nashville, Tennessee, United States	https://clinicaltrials.gov/show/NCT05795595
29		NCT05722418	CRISPR-Edited Allogeneic Anti-BCMA CAR-T Cell Therapy in Patients With Relapsed/Refractory Multiple Myeloma	Recruiting	No Results Available	Relapsed/Refractory Multiple Myeloma	Biological: CB-011	Phase 1	Interventional	Icahn School of Medicine at Mount Sinai New York, New York, United States Oncology Hematology Care, Inc Cincinnati, Ohio, United States Sarah Cannon Research Institute Nashville, Tennessee, United States	https://clinicaltrials.gov/show/NCT05722418
30		EUCTR2019-003462-40-GB	TT52CAR19 therapy for B cell acute lymphoblastic leukaemia	Authorised	No Results Available	Relapsed/ refractory B- cell acute lymphoid leukaemia;Therapeutic area: Diseases [C] - Blood and lymphatic diseases [C15]	Product Name: TT52CAR19, Pharmaceutical Form: Infusion, INN or Proposed INN: CAR19+TCRaß- T cells, Concentration unit: Other, Concentration type: equal, Concentration number: 2x10e6 -	Human pharmacology (Phase I): yes Therapeutic exploratory (Phase II): no Therapeutic confirmatory - (Phase III): no Therapeutic use (Phase IV): no	Interventional clinical trial of medicinal product	Great Ormond Street Hospital for Children NHS Trust	https://www.clinicaltrialsregister.eu/ctr-search/search?query=eudract_number:2019-003462-40
31		EUCTR2018-003916-38-DE	A study to learn about the safety and efficacy of CTX110(the "study drug product") to treat certain types of blood cancer	Authorised	No Results Available	Select subtypes of non-Hodgkin lymphoma (NHL): - diffuse large B-cell lymphoma (DLBCL) not otherwise specified (NOS) - high grade B-cell lymphoma with MYC and BCL2 and/or BCL6 rearrangements - transformed follicular lymphoma (FL) - grade 3b FL - Richter’s transformation of chronic lymphocytic leukemia (CLL)	Product Name: Not applicable, Product Code: CTX110, Pharmaceutical Form: Dispersion for infusion, INN or Proposed INN: Not available, Other descriptive name: CD19-directed allogeneic Chimeric Antigen Receptor T Cell, Concentration unit: Other, Concentration type: range, Concentration number: 25 ×10^6 cells/mL-85 x10^6 cells/mL	Human pharmacology (Phase I): yes Therapeutic exploratory (Phase II): yes Therapeutic confirmatory - (Phase III): no Therapeutic use (Phase IV): no	Interventional clinical trial of medicinal product	CRISPR Therapeutics AG	https://www.clinicaltrialsregister.eu/ctr-search/search?query=eudract_number:2018-003916-38
32		ChiCTR2200065610	A clinical study of a novel and highly sensitive protein detection technology based on gold nanoparticles and ssDNA concatemers-activated CRISPR/Cas12a system for diagnosis of esophageal squamous cell carcinoma	Not Recruiting	No Results Available	Esophageal squamous cell carcinoma	Gold Standard:Pathological results of esophageal biopsy;Index test:method: a novel and highly sensitive protein detection technology based on gold nanoparticles and ssDNA concatemers-activated CRISPR/Cas12a system, termed SENSORS. Biomarker: serum MMP13 protein and SCC protein.;	Diagnostic New Technique Clincal Study	Diagnostic test	Room 930, Building 2, Sun Yat-sen University Cancer Center, 651 Dongfeng East Road, Yuexiu District, Guangzhou, Guangdong, China	https://www.chictr.org.cn/showproj.html?proj=185134
33		CTRI/2023/01/048792	An Open Label, Single Centre Clinical Trial to assess the Clinical performance of CRISPR-CAS based sensing platform Assay in detecting Breast Cancer	Not Recruiting	No Results Available	ICD-10 Condition: C509||Malignant neoplasm of breast of unspecified site	Not provided	N/A	Observational	Rajalakshmi Hospital and Research Center. No.21/1, Lakshmipura Main Road, Opp. Lakshmipura Lake, Vidyaranyapura Post Bangalore KARNATAKA 560097 India	https://ctri.nic.in/Clinicaltrials/pmaindet2.php?trialid=78672&EncHid=&userName=CRISPR
34		ISRCTN15323014	Phase I study of base edited CAR7 T cells to treat T cell malignancies (TvT CAR7)	Recruiting	Chiesa R, Georgiadis C, Syed F, Zhan H, Etuk A, Gkazi SA, Preece R, Ottaviano G, Braybrook T, Chu J, Kubat A, Adams S, Thomas R, Gilmour K, O'Connor D, Vora A, Qasim W; Base-Edited CAR T Group. Base-Edited CAR7 T Cells for Relapsed T-Cell Acute Lymphoblastic Leukemia. N Engl J Med. 2023 Jun 14. doi: 10.1056/NEJMoa2300709. Epub ahead of print. PMID: 37314354.	Relapsed/refractory T-cell acute lymphoid leukaemia	Single-dose intravenous infusion (weight-based dosing) of a banded dose of CAR7+ T cells/kg BE-CAR7|Total duration of treatment: 28 days|Follow-up: 12 months	Phase I	Interventional	Great Ormond Street Hospital for Children Great Ormond Street London WC1N 3JH United Kingdom	https://doi.org/10.1186/ISRCTN15323014
35		NCT06014073	TRAC and Power3 Genes Knock-out Allogeneic CD19- targeting CAR-T Cell Therapy in r/r B-NHL	Recruiting	No Results Available	Non Hodgkin's Lymphoma	Biological: TRAC and Power3 Genes Knock-out Allogeneic CD19- targeting CAR_x0002_T cell (ATHENA CAR-T) |Drug: Fludarabine |Drug: Cyclophosphamide	Phase 1/Phase 2	Interventional	Biotherapeutic Department, Chinese PLA General Hospital, Beijing, China |EdiGene Inc, Beijing, China |School of Life Sciences, Peking University, Beijing, China	https://classic.clinicaltrials.gov/ct2/show/NCT06014073
36	Hematopoietic system	NCT04774536	Transplantation of Clustered Regularly Interspaced Short Palindromic Repeats Modified Hematopoietic Progenitor Stem Cells (CRISPR_SCD001) in Patients With Severe Sickle Cell Disease	Not yet recruiting	No Results Available	Sickle Cell Disease	Drug: CRISPR_SCD001	Phase 1|Phase 2	Interventional	University of California, Los Angeles, Los Angeles, California, United States|UCSF Benioff Children's Hospital, Oakland, California, United States	https://ClinicalTrials.gov/show/NCT04774536
37		NCT03167450	Examining the Knowledge, Attitudes, and Beliefs of Sickle Cell Disease Patients, Parents of Patients With Sickle Cell Disease, and Providers Towards the Integration of CRISPR in Clinical Care	Completed	No Results Available	Sickle Cell Disease	Not provided	N/A	Observational	National Human Genome Research Institute (NHGRI), Bethesda, Maryland, United States	https://ClinicalTrials.gov/show/NCT03167450
38		NCT05444894	EDIT-301 for Autologous Hematopoietic Stem Cell Transplant (HSCT) in Participants With Transfusion-Dependent Beta Thalassemia (TDT)	Recruiting	No Results Available	Transfusion Dependent Beta Thalassemia|Hemoglobinopathies|Thalassemia Major|Thalassemia Intermedia	Genetic: EDIT-301	Phase 1|Phase 2	Interventional	University of California San Francisco, Oakland, California, United States|Columbia University Medical Center - Department of Pediatrics, New York, New York, United States|Children's Hospital of Philadelphia, Philadelphia, Pennsylvania, United States|Tristar Medical Group Children's Specialists/Sarah Cannon Center for Blood Cancers, Nashville, Tennessee, United States	https://ClinicalTrials.gov/show/NCT05444894
39		NCT03655678	A Safety and Efficacy Study Evaluating CTX001 in Subjects With Transfusion-Dependent β-Thalassemia	Active, not recruiting	Frangoul H, Altshuler D, Cappellini MD et al. CRISPR-Cas9 Gene Editing for Sickle Cell Disease and β-Thalassemia. N Engl J Med. 2021 Jan 21;384(3):252-260. doi: 10.1056/NEJMoa2031054. Epub 2020 Dec 5. PMID: 33283989.	Beta-Thalassemia|Thalassemia|Genetic Diseases, Inborn|Hematologic Diseases|Hemoglobinopathies	Biological: CTX001	Phase 2|Phase 3	Interventional	Stanford University, Stanford, California, United States|Ann & Robert Lurie Children's Hospital of Chicago, Chicago, Illinois, United States|Columbia University, Manhattan, New York, United States|The Children's Hospital at TriStar Centennial Medical Center/ Sarah Cannon Center for Blood Cancers, Nashville, Tennessee, United States|Hospital for Sick Children, Toronto, Canada|BC Children's Hospita…	https://ClinicalTrials.gov/show/NCT03655678
40		NCT04853576	EDIT-301 for Autologous HSCT in Subjects With Severe Sickle Cell Disease	Recruiting	No Results Available	Sickle Cell Disease|Hemoglobinopathies	Genetic: EDIT-301	Phase 1|Phase 2	Interventional	UCSF Benioff Children's Hospital, Oakland, California, United States|Children's Hospital Colorado, Aurora, Colorado, United States|Children's Healthcare of Atlanta, Atlanta, Georgia, United States|Ann & Robert H. Lurie Children's Hospital of Chicago, Chicago, Illinois, United States|University of Mississippi Medical Center, Jackson, Mississippi, United States|Columbia University Medical Center - …	https://ClinicalTrials.gov/show/NCT04853576
41		NCT05477563	Evaluation of Efficacy and Safety of a Single Dose of CTX001 in Participants With Transfusion-Dependent β-Thalassemia and Severe Sickle Cell Disease	Recruiting	No Results Available	Beta-Thalassemia|Thalassemia|Hematologic Diseases|Genetic Diseases, Inborn|Hemoglobinopathies|Sickle Cell Anemia|Sickle Cell Disease	Biological: CTX001	Phase 3	Interventional	Atrium Health Levine Children's Hospital, Charlotte, North Carolina, United States|SCRI at the Children's Hospital at TriStar Centennial, Nashville, Tennessee, United States|Ospedale Pediatrico Bambino Ges霉, IRCCS, Rome, Italy	https://ClinicalTrials.gov/show/NCT05477563
42		NCT03745287	A Safety and Efficacy Study Evaluating CTX001 in Subjects With Severe Sickle Cell Disease	Active, not recruiting	Frangoul H, Altshuler D, Cappellini MD et al. CRISPR-Cas9 Gene Editing for Sickle Cell Disease and β-Thalassemia. N Engl J Med. 2021 Jan 21;384(3):252-260. doi: 10.1056/NEJMoa2031054. Epub 2020 Dec 5. PMID: 33283989.	Sickle Cell Disease|Hematological Diseases|Hemoglobinopathies	Biological: CTX001	Phase 2|Phase 3	Interventional	Lucille Packard Children's Hospital of Stanford University, Palo Alto, California, United States|Ann & Robert Lurie Children's Hospital of Chicago, Chicago, Illinois, United States|University of Illinois at Chicago Hospitals and Health Systems, Chicago, Illinois, United States|Columbia University Medical Center (21+ years), New York, New York, United States|Columbia University Medical Center (鈮?1…	https://ClinicalTrials.gov/show/NCT03745287
43		NCT04925206	A Safety and Efficacy Study Evaluating ET-01 in Subjects With Transfusion Dependent β-Thalassaemia	Active, not recruiting	No Results Available	Transfusion Dependent Beta-Thalassaemia	Biological: ET-01	Phase 1	Interventional	Nanfang Hospital of Southern Medical University, Guangzhou, Guangdong, China|Guangzhou Women and Children's Medical Center, Guangzhou, Guangdong, China|Shenzhen Children's Hospital, Shenzhen, Guangdong, China|Institute of Hematology & Blood Diseases Hospital, Tianjin, Tianjin, China	https://ClinicalTrials.gov/show/NCT04925206
44		NCT03728322	iHSCs With the Gene Correction of HBB Intervent Subjests With β-thalassemia Mutations	Unknown status	No Results Available	Thalassemia	Biological: iHSCs treatment group	Early Phase 1	Interventional	No location data	https://ClinicalTrials.gov/show/NCT03728322
45		NCT05356195	Evaluation of Safety and Efficacy of CTX001 in Pediatric Participants With Transfusion-Dependent β-Thalassemia (TDT)	Recruiting	No Results Available	Beta-Thalassemia|Thalassemia|Genetic Diseases, Inborn|Hematologic Diseases|Hemoglobinopathies	Biological: CTX001	Phase 3	Interventional	SCRI at the Children's Hospital at TriStar Centennial, Nashville, Tennessee, United States|The Hospital for Sick Children, Toronto, Canada|Universit盲tsklinikum D眉sseldorf Hospital Duesseldorf, D眉sseldorf, Germany|Ospedale Pediatrico Bambino Ges霉, IRCCS, Rome, Italy|Great Ormond Street Hospital for Children NHS Foundation Trust, London, United Kingdom	https://ClinicalTrials.gov/show/NCT05356195
46		NCT05329649	Evaluation of Safety and Efficacy of CTX001 in Pediatric Participants With Severe Sickle Cell Disease (SCD)	Recruiting	No Results Available	Sickle Cell Disease|Hydroxyurea Failure|Hydroxyurea Intolerance|Hemoglobinopathies|Hematological Diseases	Biological: CTX001	Phase 3	Interventional	The Children's Hospital at TriStar Centennial Medical Center/ Sarah Cannon Center for Blood Cancers, Nashville, Tennessee, United States|Dipartimento di Onco-Ematologia e Terapia Cellulare e Genica Ospedale Pediatrico Bambino Gesu - IRCCS, Rome, Italy	https://ClinicalTrials.gov/show/NCT05329649
47		NCT04208529	A Long-term Follow-up Study in Subjects Who Received CTX001	Enrolling by invitation	No Results Available	Beta-Thalassemia|Thalassemia|Sickle Cell Disease|Hematologic Diseases|Hemoglobinopathies|Genetic Diseases, Inborn|Sickle Cell Anemia	Biological: CTX001	N/A	Observational	Columbia University Medical Center (21+ years), New York, New York, United States|Columbia University Medical Center, New York, New York, United States|Children's Hospital of Philadelphia, Philadelphia, Pennsylvania, United States|St. Jude Children's Research Hospital, Memphis, Tennessee, United States|The Children's Hospital at TriStar Centennial Medical Center/ Sarah Cannon Center for Blood Can…	https://ClinicalTrials.gov/show/NCT04208529
48		NCT05577312	Safety and Efficacy Evaluation of BRL-101 in Subjects With Transfusion-Dependent β-Thalassemia	Recruiting	No Results Available	Beta-Thalassemia	Drug: BRL-101	Phase 1	Interventional	Nanfang Hospital, Southern Medical University, Guangzhou, Guangdong, China|The First Affiliated Hospital of Guangxi Medical University, Nanning, Guangxi, China|Xiangya Hospital of Central South University, Changsha, Hunan, China|Blood Diseases Hospital, Chinese Academy of Medical Sciences, Tianjin, Tianjin, China	https://ClinicalTrials.gov/show/NCT05577312
49		NCT05951205	Evaluation of Efficacy and Safety of a Single Dose of Exa-cel in Participants With Severe Sickle Cell Disease, βS/​βC Genotype	Not yet recruiting	No Results Available	Sickle Cell Disease	Biological: Exa-cel	Phase 3	Interventional	No location data	https://clinicaltrials.gov/study/NCT05951205?term=Clustered%20Regularly%20Interspaced%20Short%20Palindromic%20Repeats&viewType=Table&limit=100&page=1&rank=69
50		ChiCTR2100053406	CD34-positive cells edited by autologous CRISPR-Cas9 (RM-001) treatment of transfusion-dependent β-thalassemia safety and effectiveness exploration	Recruiting	No Results Available	Transfusion-dependent β-thalassemia	Intravenous injection of autologous CD34-positive cells gene-edited in vitro by CRISPR-Cas9 gene editing system	0	Interventional	the First Affiliated Hospital of Guangxi Medical University	https://www.chictr.org.cn/com/25/showprojen.aspx?proj=136638
51		ChiCTR2100052858	Safety and Efficacy Evaluation of RM-001 for the Treatment of Transfusions Dependent β-Thalassaemia Major	Recruiting	No Results Available	β-thalassemia	RM-001 cells infusion	0	Interventional	The 923rd Hospital of the People's Liberation Army	https://www.chictr.org.cn/com/25/showprojen.aspx?proj=135649
52		NCT06041620	Safety and Efficacy Evaluation of Autologous CRISPR-Cas12b Edited Hematopoietic Stem Cells	Not Recruiting	No Results Available	Thalassemia, Beta	Biological: VGB-Ex01	N/A	Interventional	Regenerative Medicine Center, Tianjin, China	https://clinicaltrials.gov/study/NCT06041620?term=Clustered%20Regularly%20Interspaced%20Short%20Palindromic%20Repeats&city=&limit=100&page=1&viewType=Card&rank=14
53		NCT04443907	Study of Safety and Efficacy of Genome-edited Hematopoietic Stem and Progenitor Cells in Sickle Cell Disease (SCD)	Not Recruiting	No Results Available	Sickle Cell Disease	BIOLOGICAL: OTQ923|BIOLOGICAL: OTQ923	Phase I	Interventional	University of Chicago SC - 2, Chicago, Illinois, 60637, United States|Memorial Sloan Kettering Cancer Ctr, New York, New York, 10065, United States|St Jude Children's Research Hospital, Memphis, Tennessee, 38105-3678, United States|Novartis Investigative Site, Milano, MI, 20132, Italy	https://clinicaltrials.gov/study/NCT04443907
54	Respiratory system	NCT04074369	Evaluation of CRISPR-based Test for the Rapid Identification of TB in Pulmonary Tuberculosis Suspects	Unknown status	No Results Available	Tuberculosis, Pulmonary	Diagnostic Test: CRISPR-based Test	N/A	Observational	Huashan Hospital, Shanghai, Shanghai, China	https://ClinicalTrials.gov/show/NCT04074369
55		NCT04178382	Effect of PCR-CRISPR/Cas12a on the Early Anti-infective Schemes in Patients With Open Air Pneumonia	Unknown status	Wang Y, Liang X, Jiang Y, Dong D, Zhang C, Song T, Chen M, You Y, Liu H, Ge M, Dai H, Xi F, Zhou W, Chen JQ, Wang Q, Chen Q, Yu W. Novel fast pathogen diagnosis method for severe pneumonia patients in the intensive care unit: randomized clinical trial. Elife. 2022 Oct 7;11:e79014. doi: 10.7554/eLife.79014. PMID: 36205312; PMCID: PMC9605691.	Severe Sepsis	Diagnostic Test: PCR-CRISPR/Cas12a detection	N/A	Interventional	The Affliated Drum Tower Hospital, Medical School of Nanjing University, Nanjing, Jiangsu, China	https://ClinicalTrials.gov/show/NCT04178382
56		NCT04990557	CRISPR/Cas9-modified Human T Cell ( PD-1and ACE2 Knockout Engineered T Cells ) for Inducing Long-term Immunity in COVID-19 Patients	Not yet recruiting	No Results Available	COVID-19 Respiratory Infection	Drug: PD-1 and ACE2 Knockout T Cells	Phase 1|Phase 2	Interventional	No location data	https://ClinicalTrials.gov/show/NCT04990557
57		NCT05143593	Species-specific Bacterial Detector for Fast Pathogen Diagnosis of Severe Pneumonia	Not yet recruiting	No Results Available	Severe Pneumonia	Diagnostic Test: SSBD(PCR-CRISPR/Cas12a)	N/A	Interventional	The First People's Hospital of Changzhou, Changzhou, Jiangsu, China|Jiangsu Province hospital, Nanjing, Jiangsu, China|The Second Affiliated Hospital of Nanjing Medical University, Nanjing, Jiangsu, China|The Affliated Drum Tower Hospital, Medical School of Nanjing University, Nanjing, Jiangsu, China|Suzhou Manicipal Hospital, Suzhou, Jiangsu, China	https://ClinicalTrials.gov/show/NCT05143593
58		NCT05107258	A Clinical Evaluation of Pine Trees Health Test System Including the Pine Trees Health Reader and COVID-19 Test for Point-of-Care	Completed	No Results Available	SARS (Severe Acute Respiratory Syndrome)|Covid19	Diagnostic Test: The Pine Trees Health Test System	N/A	Observational	ASCLEPES Research Center, Spring Hill, Florida, United States|PMG Research of Piedmont Healthcare, Statesville, North Carolina, United States|Eastside Research Associates, Redmond, Washington, United States	https://ClinicalTrials.gov/show/NCT05107258
59		NCT05331976	A Clinical Evaluation of Proof Diagnostics Test System Including the Proof Diagnostics Reader and COVID-19 Test	Completed	No Results Available	COVID-19|Asymptomatic COVID-19	Diagnostic Test: Proof Lab Test System	N/A	Observational	Asclepes Research Center, Spring Hill, Florida, United States|PMG Research of Piedmont Healthcare, Statesville, North Carolina, United States|Eastside Research Associates, Redmond, Washington, United States	https://ClinicalTrials.gov/show/NCT05331976
60		CTRI/2021/02/030950	Validation of the TataMD CHECK CRISPR SARS-CoV-2 test 1.0 for the diagnosis of COVID-19	Not Recruiting	No Results Available	B972- Coronavirus as the cause of diseases classified elsewhere	Intervention1:Nil	N/A	Observational	Tata Medical and Diagnostics Limited	http://www.ctri.nic.in/Clinicaltrials/pmaindet2.php?trialid=52209
61		ChiCTR2000029810	Clinical study of a novel high sensitivity nucleic acid assay for novel coronavirus pneumonia (COVID-19) based on CRISPR-cas protein	Recruiting	No Results Available	Novel Coronavirus Pneumonia (COVID-19)	Gold Standard:Nucleic acid test for new coronavirus, RT-PCR;Index test:RT-PCR product of SARS-CoV-2.;	0	Diagnostic test	Shenzhen Second People's Hospital	http://www.chictr.org.cn/showproj.aspx?proj=49407
62	Endocrine, nutritional, or metabolic system	NCT05565248	An Open-Label, FIH Study Evaluating the Safety, Tolerability, and Efficacy of VCTX211 Combination Product in Subjects With T1D	Recruiting	No Results Available	Diabetes Mellitus|Diabetes Mellitus, Type 1|Glucose Metabolism Disorders|Metabolic Disease|Endocrine System Diseases|Autoimmune Diseases|Immune System Diseases	Combination Product: VCTX211	Phase 1|Phase 2	Interventional	University of Alberta, Edmonton, Alberta, Canada|University of British Columbia, Vancouver, British Columbia, Canada	https://ClinicalTrials.gov/show/NCT05565248
63		NCT05210530	An Open-Label, FIH Study Evaluating the Safety and Tolerability of VCTX210A Combination Product in Subjects With T1D	Completed	No Results Available	Diabetes Mellitus|Diabetes Mellitus, Type 1|Glucose Metabolism Disorders|Metabolic Disease|Endocrine System Diseases|Autoimmune Diseases|Immune System Diseases	Combination Product: VCTX210A unit	Phase 1	Interventional	University of Alberta, Edmonton, Alberta, Canada|University of British Columbia, Vancouver, British Columbia, Canada|LMC Manna, Toronto, Ontario, Canada	https://ClinicalTrials.gov/show/NCT05210530
64		NCT04601051	Study to Evaluate Safety, Tolerability, Pharmacokinetics, and Pharmacodynamics of NTLA-2001 in Patients With Hereditary Transthyretin Amyloidosis With Polyneuropathy (ATTRv-PN) and Patients With Transthyretin Amyloidosis-Related Cardiomyopathy (ATTR-CM)	Recruiting	Gillmore JD, Gane E, Taubel J et al. CRISPR-Cas9 In Vivo Gene Editing for Transthyretin Amyloidosis. N Engl J Med. 2021 Aug 5;385(6):493-502. doi: 10.1056/NEJMoa2107454. Epub 2021 Jun 26. PMID: 34215024.	Transthyretin-Related (ATTR) Familial Amyloid Polyneuropathy|Transthyretin-Related (ATTR) Familial Amyloid Cardiomyopathy|Wild-Type Transthyretin Cardiac Amyloidosis	Biological: NTLA-2001	Phase 1	Interventional	Clinical Trial Site, Paris, France|Clinical Trial Site, Auckland, New Zealand|Clinical Trial Site, Umea, Sweden|Clinical Trial Site, London, United Kingdom	https://ClinicalTrials.gov/show/NCT04601051
65		NCT05601557	Research on the Clinical Characteristics and Key Diagnosis and Treatment Technology of Genetic and Metabolic Liver Disease	Not yet recruiting	No Results Available	Diagnosis ,Treatment,Genetic and Metabolic Liver Disease	Other: There is no intervention	N/A	Observational	No location data	https://ClinicalTrials.gov/show/NCT05601557
66		NCT05850871	Drug Resistance Mechanism of Enterobacteriaceae and Its Strategies	Recruiting	No Results Available	Carbapenem-Resistant Enterobacteriaceae Infection	Drug: CAZ/AVI plus Aztreonam|Other: Conventional treatment	N/A	Interventional	Mingju Hao Jinan, Shandong, China	https://clinicaltrials.gov/show/NCT05850871
67		ChiCTR1800014941	CRISPR study the mechanism of RSPO\WNT in iver fibrosis	Recruiting	No Results Available	liver diseases	Case series:Case series;	Other	Relative factors research	The First Hospital of Jiaxing (The First Hospital affliated to Jiaxing College)	http://www.chictr.org.cn/showproj.aspx?proj=25373
68		ACTRN12623000809639	A Phase 1 Open-label, Multicenter, First-in-human, Ascending Single-dose Study Evaluating the Safety and Tolerability of a Lipid Nanoparticle Formulation of CRISPR–Guide RNA–Cas9 Nuclease (CTX310) for In Vivo Editing of the Angiopoietin-like 3 (ANGPTL3) Gene in Subjects With Refractory Dyslipidemias	Not Recruiting	No Results Available	Refractory Dyslipidemias	Subjects will receive a single dose of CTX310 via intravenous (IV) infusion. Planned ascending doses levels will be 0.1 mg/kg, 0.3 mg/kg, 0.6 mg/kg, 0.8 mg/kg. Participants will receive only one dose.	Phase 1	Interventional	Clinical Development, 105 W. First St, Boston, MA 02127 United States of America	https://trialsearch.who.int/Trial2.aspx?TrialID=ACTRN12623000809639
69	Immune system	NCT03164135	Safety of Transplantation of CRISPR CCR5 Modified CD34+ Cells in HIV-infected Subjects With Hematological Malignances	Unknown status	Xu L, Wang J, Liu Y et al. CRISPR-Edited Stem Cells in a Patient with HIV and Acute Lymphocytic Leukemia. N Engl J Med. 2019 Sep 26;381(13):1240-1247. doi: 10.1056/NEJMoa1817426. Epub 2019 Sep 11. PMID: 31509667.	HIV-1-infection	Genetic: CCR5 gene modification	N/A	Interventional	307 Hospital of PLA (Affiliated Hospital of Academy to Military Medical Sciences), Beijing, Beijing, China	https://ClinicalTrials.gov/show/NCT03164135
70		NCT05144386	Study of EBT-101 in Aviremic HIV-1 Infected Adults on Stable ART	Recruiting	No Results Available	HIV-1-infection	Biological: EBT-101	Phase 1	Interventional	University of California San Francisco, San Francisco, California, United States|Washington University, Saint Louis, Missouri, United States|Cooper Health, Camden, New Jersey, United States	https://ClinicalTrials.gov/show/NCT05144386
71		NCT05143307	Long-Term Follow-Up Study of HIV-1 Infected Adults Who Received EBT-101	Enrolling by invitation	No Results Available	HIV-1-infection	Biological: EBT-101	Phase 1	Interventional	University of California San Francisco, San Francisco, California, United States|Washington University, Saint Louis, Missouri, United States|Cooper Health, Camden, New Jersey, United States	https://ClinicalTrials.gov/show/NCT05143307
72		CTRI/2023/08/057076	Targeting SLE heterogeneity in geriatric & childhood lupus using single-cell transcriptomics & validation using a CRISPR-based gene editing system for patient-specific precision medicine	Not Recruiting	No Results Available	ICD-10 Condition: M048||Other autoinflammatory syndromes	Not provided	N/A	Observational	Department of Biochemistry All India Institute of Medical Sciences New Delhi, DELHI|Department of General Medicine KMC Manipal,Udupi,KARNATAKA	https://ctri.nic.in/Clinicaltrials/pmaindet2.php?trialid=87087&EncHid=&userName=CRISPR
73	Visual system	NCT04560790	Safety and Efficacy of CRISPR/Cas9 mRNA Instantaneous Gene Editing Therapy to Treat Refractory Viral Keratitis	Completed	No Results Available	Viral Keratitis|Blindness Eye|Herpes Simplex Virus Infection|Cornea	Drug: BD111 Adult single group Dose	N/A	Interventional	Eye & Ent Hospital of Fudan University, Shanghai, Shanghai, China	https://ClinicalTrials.gov/show/NCT04560790
74		NCT03872479	Single Ascending Dose Study in Participants With LCA10	Active, not recruiting	Zhang X, Zhang D, Thompson JA et al. Gene correction of the CLN3 c.175G>A variant in patient-derived induced pluripotent stem cells prevents pathological changes in retinal organoids. Mol Genet Genomic Med. 2021 Mar;9(3):e1601. doi: 10.1002/mgg3.1601. Epub 2021 Jan 26. PMID: 33497524; PMCID: PMC8104174.	Leber Congenital Amaurosis 10|Inherited Retinal Dystrophies|Eye Diseases, Hereditary|Retinal Disease|Retinal Degeneration|Vision Disorders|Eye Disorders Congenital	Drug: EDIT-101	Phase 1|Phase 2	Interventional	Bascom Palmer Eye Institute, Miami, Florida, United States|Massachusetts Eye and Ear Infirmary, Boston, Massachusetts, United States|W.K. Kellogg Eye Center - University of Michigan, Ann Arbor, Michigan, United States|Casey Eye Institute - OSHU, Portland, Oregon, United States|University of Pennsylvania, Philadelphia, Pennsylvania, United States	https://ClinicalTrials.gov/show/NCT03872479
75		NCT05805007	Safety and Tolerability Study of Gene Editing Drug ZVS203e in Participants With Retinitis Pigmentosa	Not yet recruiting	No Results Available	Retinitis Pigmentosa	Drug: ZVS203e	Early Phase 1	Interventional	No location data	https://clinicaltrials.gov/show/NCT05805007
76		NCT06031727	CRISPR/Cas13-mediated RNA Targeting Therapy for the Treatment of nAMD Investigator-Initiated Trial (SIGHT-I)	Recruiting	No Results Available	Neovascular Age-related Macular Degeneration(nAMD)	Genetic: HG202	Early Phase 1	Interventional	Eye & ENT Hospital of Fudan University, Shanghai, China|Tianjin Medical University Eye Hospital, Tianjing, China	https://classic.clinicaltrials.gov/ct2/show/NCT06031727#contacts
77	Skeletal system	NCT05514249	Treatment of a Single Patient With CRD-TMH-001	Active, not recruiting	No Results Available	Duchenne Muscular Dystrophy	Drug: CRD-TMH-001	Phase 1	Interventional	UMass Chan Medical School, Worcester, Massachusetts, United States	https://ClinicalTrials.gov/show/NCT05514249
78		ChiCTR2100041827	the treatment of hybrid exosomes for cartilage defect	Recruiting	No Results Available	Osteoarthritis	case series:Nil;	0	Basic Science	Shenzhen Second People's Hospital	http://www.chictr.org.cn/showproj.aspx?proj=119549
79	Others	NCT03855631	Exploiting Epigenome Editing in Kabuki Syndrome: a New Route Towards Gene Therapy for Rare Genetic Disorders	Completed	No Results Available	Kabuki Syndrome 1	Genetic: Intervention on primary cultured cells	N/A	Observational	Arnaud de villeneuve Hospital, Montpellier, Herault, France	https://ClinicalTrials.gov/show/NCT03855631
80		NCT05120830	NTLA-2002 in Adults With Hereditary Angioedema (HAE)	Recruiting	No Results Available	Hereditary Angioedema	Biological: Biological NTLA-2002|Other: Normal Saline IV Administration	Phase 1|Phase 2	Interventional	Academic Medical Center - University of Amsterdam, Amsterdam, Netherlands|Study Site, Auckland, New Zealand|Cambridge University Hospitals NHS Foundation Trust Addenbrookes Hospital, Cambridge, United Kingdom	https://ClinicalTrials.gov/show/NCT05120830
81		NCT05740761	Gene Editing as a Therapeutic Approach for Rett Syndrome	Recruiting	No Results Available	Rett Syndrome	Other: Gene editing in vitro	N/A	Observational	University of Siena Siena, Italy	https://clinicaltrials.gov/show/NCT05740761
82		ChiCTR2000041176	Clinic significance of rapid hypersensitivity detection of Aspergillus fumigatus based on CRISPR	Recruiting	No Results Available	Aspergillosis	Gold Standard:Specimen culture;Index test:CRISPR-based&#32;rapid&#32;and&#32;ultra-sensitive&#32;diagnostic&#32;test&#32;for&#32;Aspergillus&#32;fumigatus;	0	Diagnostic test	West China Hospital of Sichuan Universty	http://www.chictr.org.cn/showproj.aspx?proj=65878
83		ChiCTR2300073795	An international, multicenter, Phase I Open Label Study to Evaluate Safety and Efficacy of Administration of Autologous CD34+ Cells Gene Edited Ex Vivo Using a CRISPR/AAV6 Platform to Introduce a Codon Optimized cDNA Version of the Red-Cell Type Pyruvate Kinase Genein Adult and Pediatric Patients with Severe Pyruvate Kinase	Not Recruiting	No Results Available	Pyruvate Kinase Deficiency	1:Busulfan Pretreated + autologous gene edited CD34+ cells (DNGT-101 cell injection) (>2e6CD34+ cells /kg);	0	Interventional	Shanghai Children's Medical Center,1678 Dongfang Road, Shanghai, PRC.	https://www.chictr.org.cn/showproj.html?proj=199170
84		NCT06025032	A Study in Subjects With Otoferlin Mutation-related Hearing Loss Using RNA Base-eDiting Therapy	Not Recruiting	No Results Available	Congenital Hearing Loss	GENETIC: HG205	Early Phase 2	Interventional	Eye & ENT Hospital of Fudan University, Shanghai, China	https://clinicaltrials.gov/study/NCT06025032
